# Supplementary material for: Stability Enhancement of Freeze-Dried Gelatin/Alginate Coacervates for bFGF Delivery
Source: MDPI journal article supplement (doi:10.3390/pharmaceutics14122548), 2022-11-22

# Supporting Information

## Fig. S1

Thermal analysis

(a)

TGA of high molecular weight gelatin (HWGA)

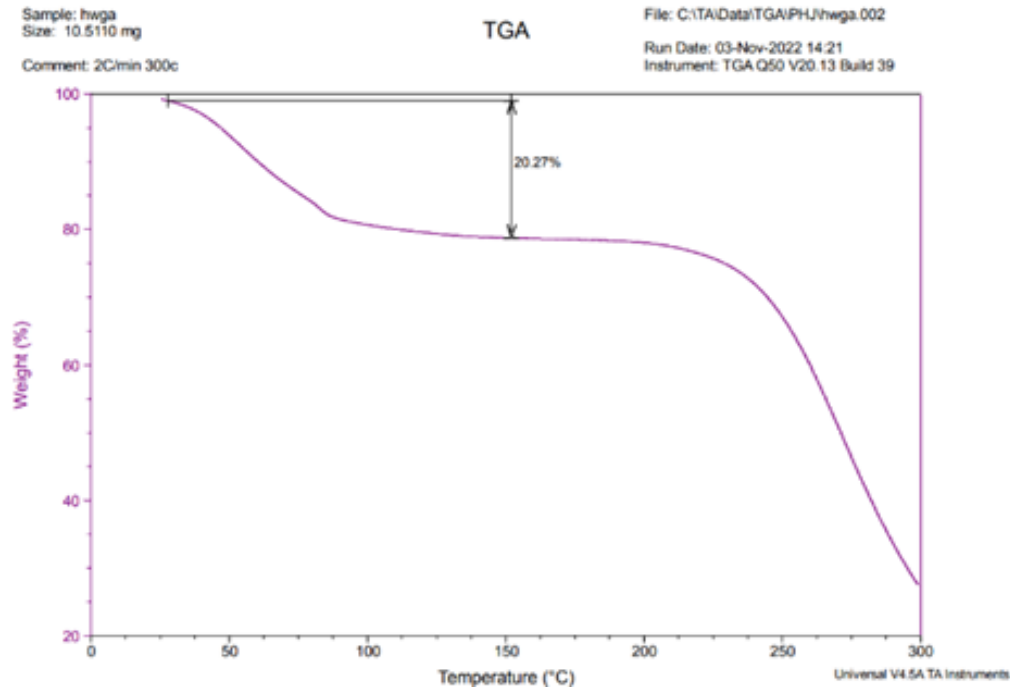

TGA of sodium alginate (SA)

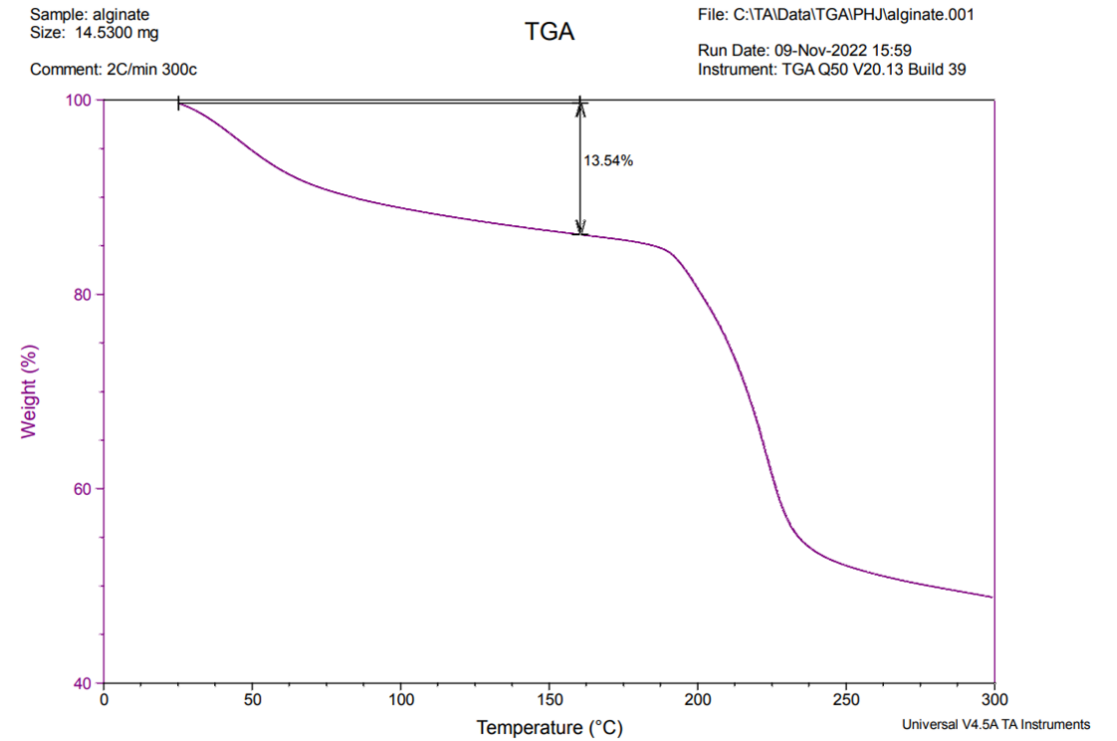

(b)

TGA of freeze-dried  
GA/SA coacervate  
without trehalose

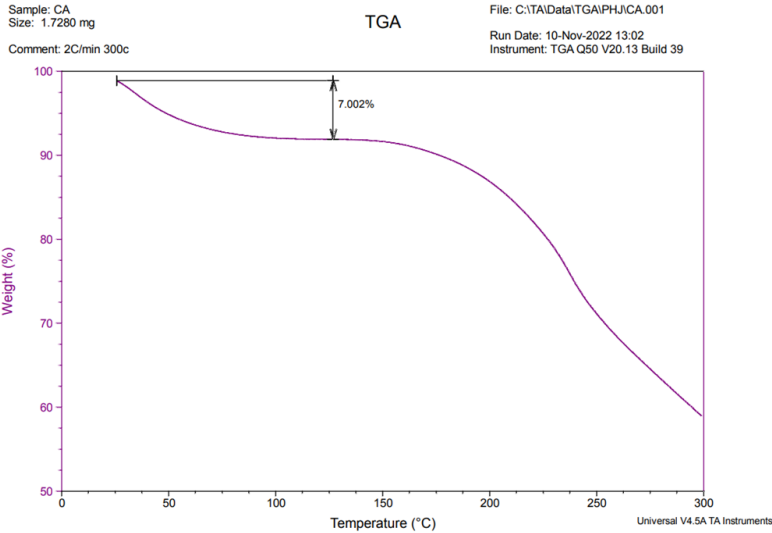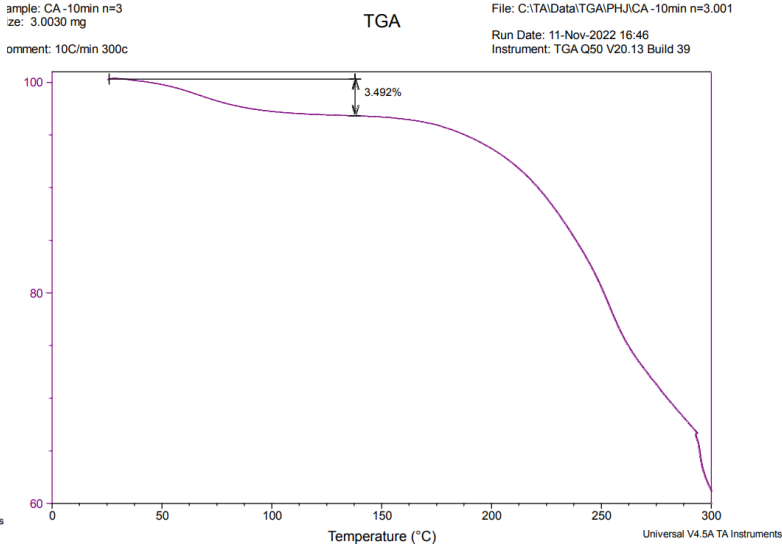

TGA of freeze-dried  
GA/SA coacervate  
with trehalose

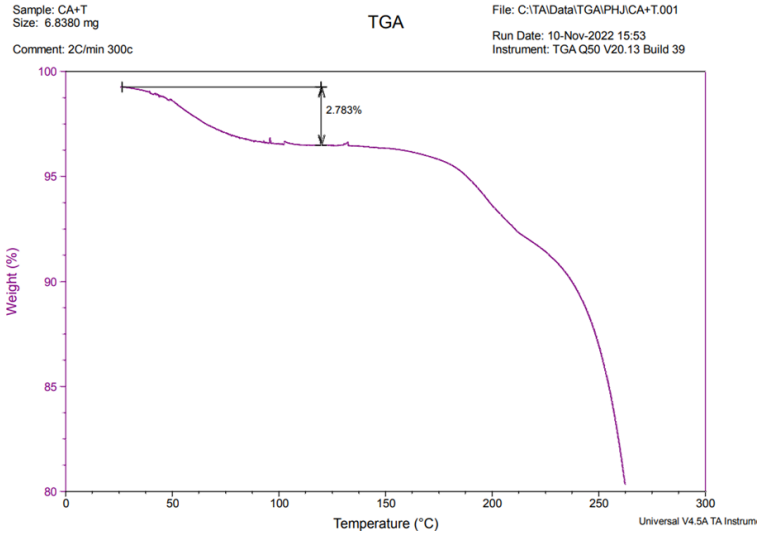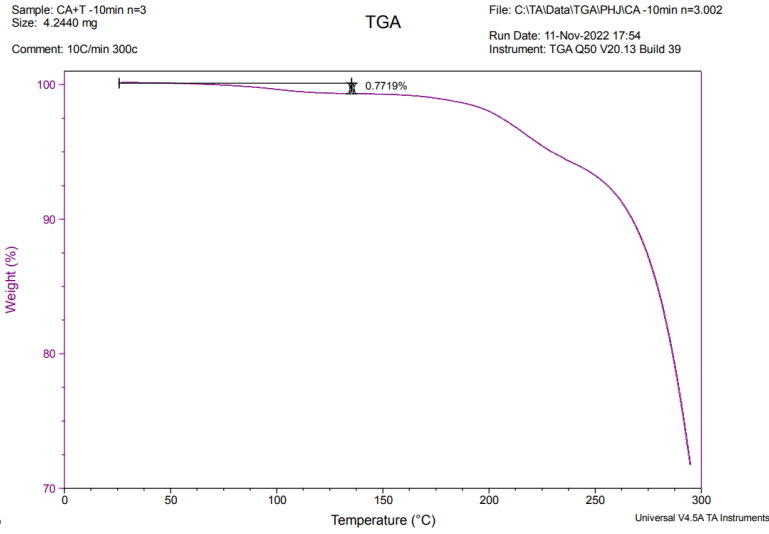

(c)

## DSC of high molecular weight gelatin (HWGA)

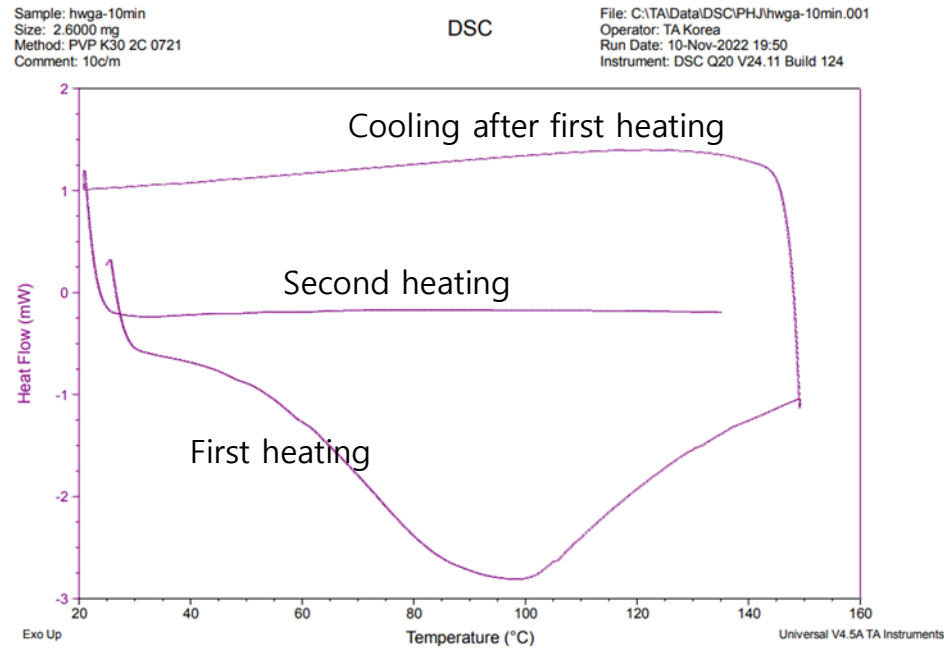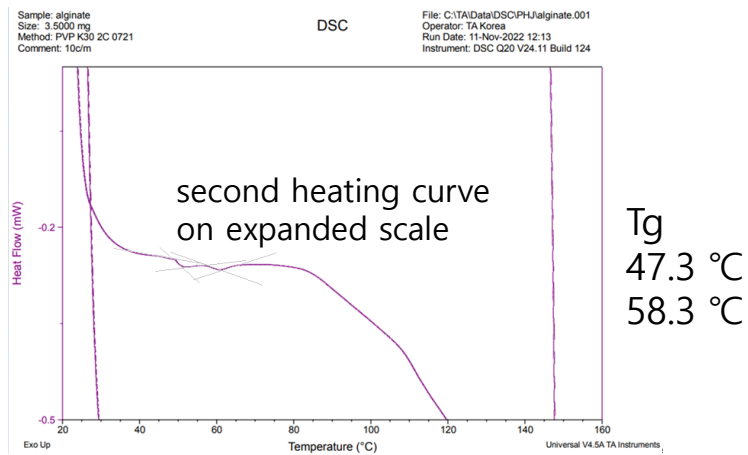

## DSC of sodium alginate (SA)

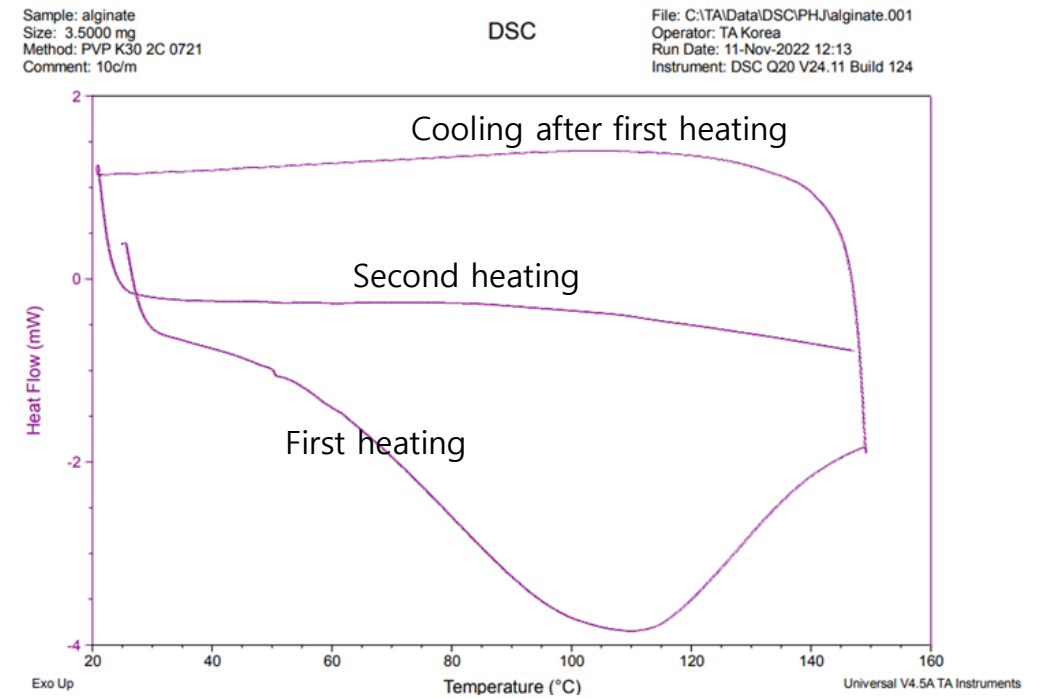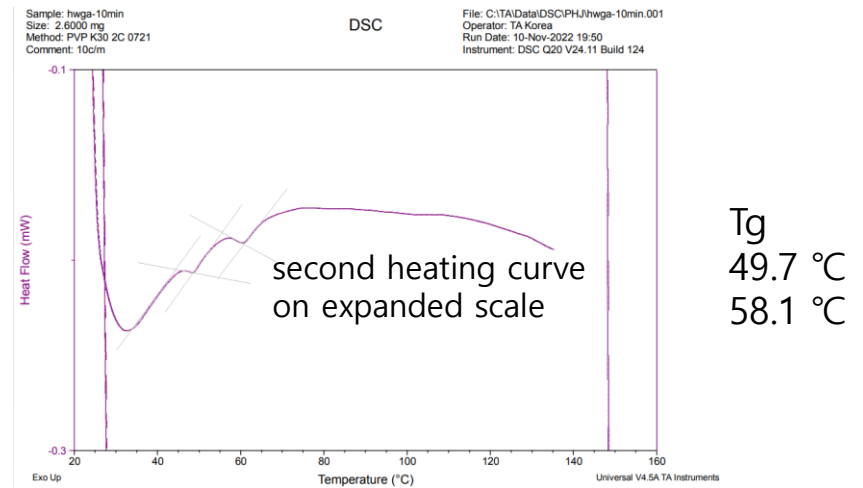

(d) heating-cooling-heating

DSC of freeze-dried GA/SA coacervate without trehalose

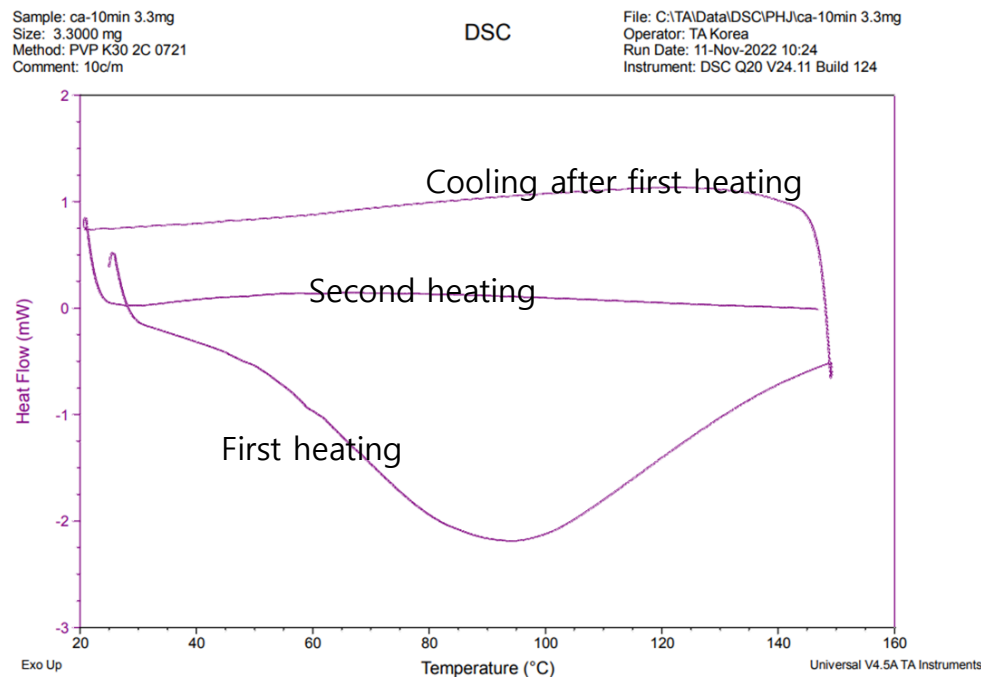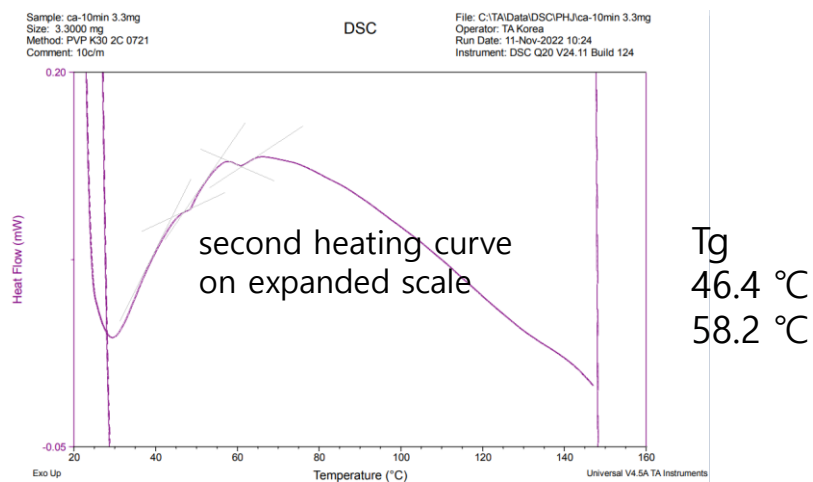

DSC of freeze-dried GA/SA coacervate with trehalose

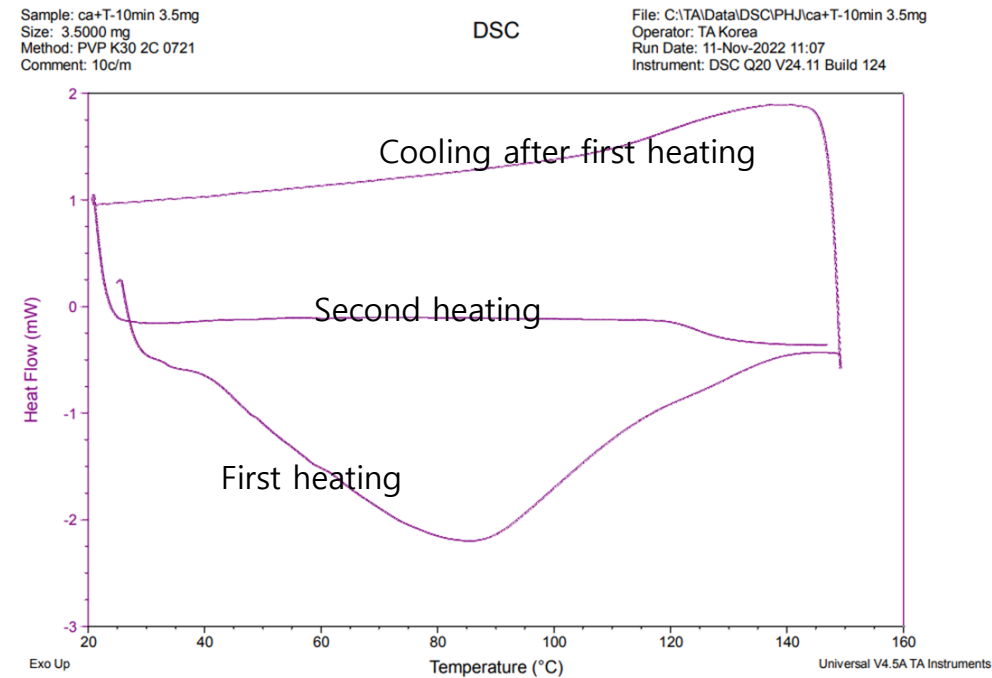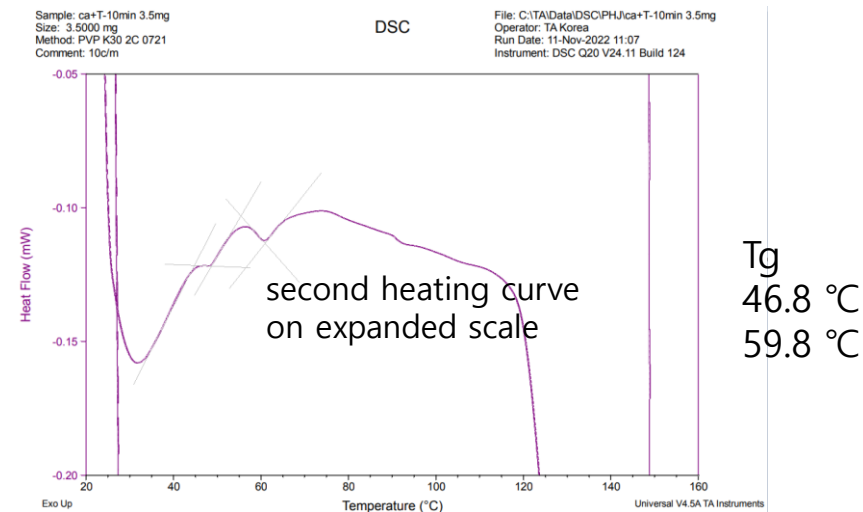

(d) heating-10 min stay at 100 °C-cooling-heating

DSC of freeze-dried GA/SA coacervate without trehalose

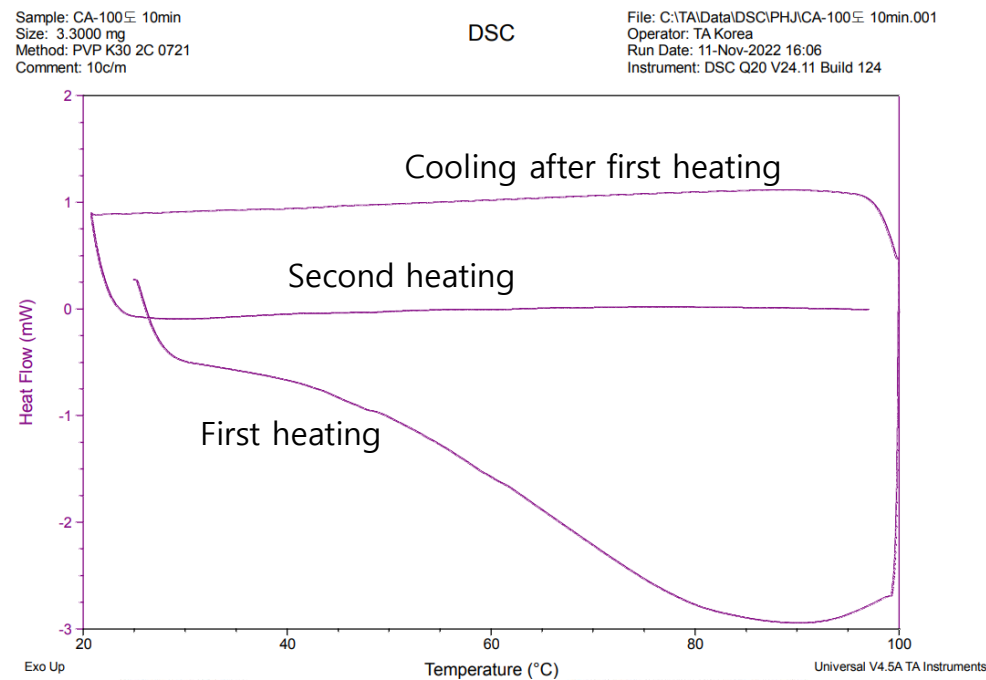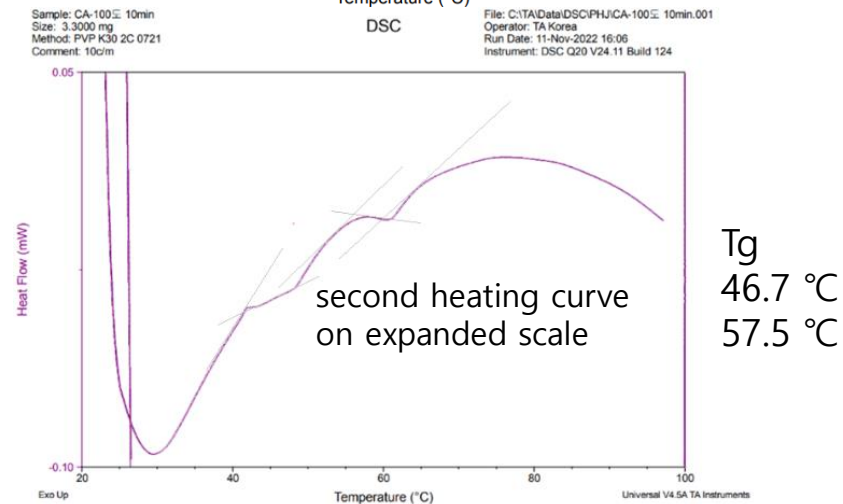

DSC of freeze-dried GA/SA coacervate with trehalose

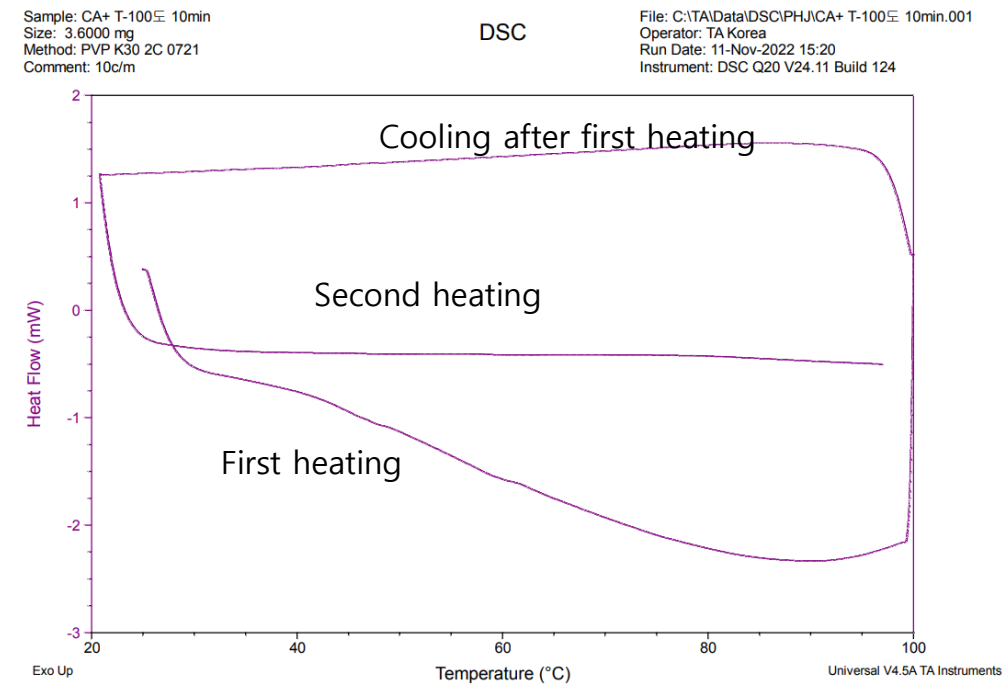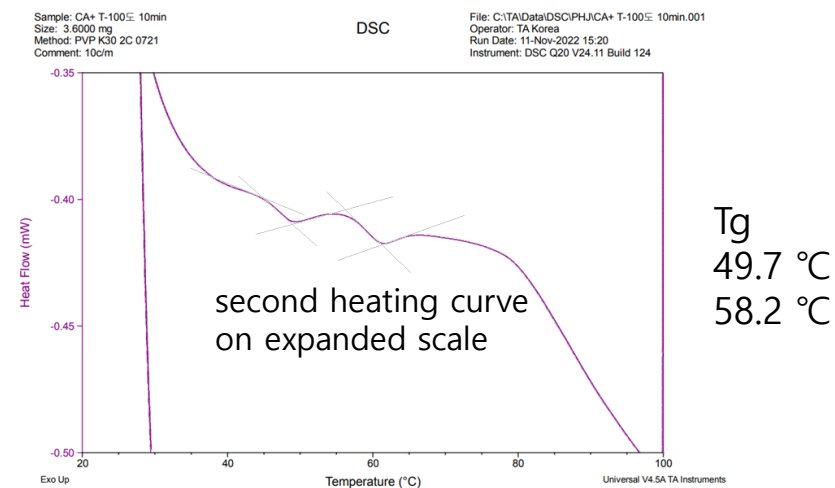

Supplement: s1 [file s1]
